# Supplementary material
Source: Research Square preprint supplement (doi:10.21203/rs.3.rs-9960398/v1)
Supplement: Supplementary file 1 [file 0501c06b1f6158c425779bfe.pdf]

1 **A self-reinforcing HIF2 $\alpha$ –miR-23a-3p–PHD1 circuit rewires oxygen sensing**  
2 **to sustain pulmonary endothelial barrier integrity**

3  
4 Chan Chen<sup>1,2#</sup>, Suobei Li<sup>1,2#</sup>, Meiqin Li<sup>1,2</sup>, Ke Li<sup>1,2</sup>, Jia Wei<sup>1,2</sup>, Chao Liu<sup>1,2</sup>, Wei Ruan<sup>1,2\*</sup>

5  
6 <sup>1</sup>Department of Anesthesiology, Second Xiangya Hospital, Central South University, Changsha,  
7 410011, China.

8 <sup>2</sup>Anesthesiology Research Institute, Central South University, Changsha, 410011, China.

9  
10 #These authors contributed equally.

11 \*Correspondence to:

12 Wei Ruan, MD, PhD. Email: [ruanwei2001@csu.edu.cn](mailto:ruanwei2001@csu.edu.cn)

|    |                                                                                        |    |
|----|----------------------------------------------------------------------------------------|----|
| 13 | <b>Contents</b>                                                                        |    |
| 14 |                                                                                        |    |
| 15 | <b>Supplementary Note 1: Supplementary Figures</b> .....                               | 3  |
| 16 | <b>Supplementary Note 2: Supplementary Tables</b> .....                                | 9  |
| 17 | <b>Supplementary Note 3: Uncropped gel blot images for main Figures</b> .....          | 19 |
| 18 | <b>Supplementary Note 4: Uncropped gel blot images for Extended Data Figures.</b> .... | 26 |
| 19 | <b>Supplementary Note 5: Uncropped gel blot images for Supplementary Figures</b> ..... | 28 |
| 20 |                                                                                        |    |
| 21 |                                                                                        |    |

22 **Supplementary Note 1: Supplementary Figures**

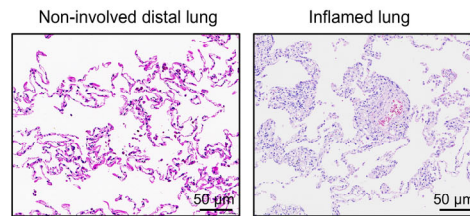

23

24 **Supplementary Fig. 1. Histological review of human lung samples.**

25 Representative H&E-stained sections show preserved alveolar parenchyma in non-involved  
26 distal lung controls and inflammatory infiltration/inflammatory injury in inflamed lung  
27 specimens, without tumor involvement in the analyzed regions. Scale bar, 50 µm. Images are  
28 representative of n = 6 non-involved distal lung specimens and n = 6 inflamed lung specimens.

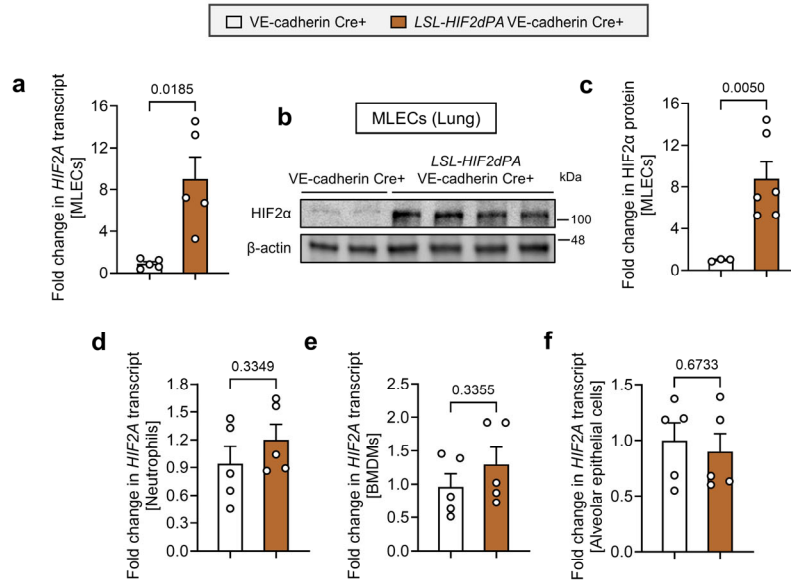

29  
30  
31  
32  
33  
34  
35  
36  
37  
38

**Supplementary Fig. 2. Confirmation of endothelial-specific overexpression of stabilized HIF2 $\alpha$  in *LSL-HIF2dPA* VE-cadherin Cre<sup>+</sup> mice.**

**a**, *HIF2A* transcript levels in MLECs isolated from VE-cadherin Cre<sup>+</sup> and *LSL-HIF2dPA* VE-cadherin Cre<sup>+</sup> mice. n = 5 mice/group; unpaired two-tailed Welch's t-test. **b** and **c**, HIF2 $\alpha$  protein levels in isolated MLECs. **b**, Western blot. **c**, Quantification. n = 3 VE-cadherin Cre<sup>+</sup> mice and n = 6 *LSL-HIF2dPA* VE-cadherin Cre<sup>+</sup> mice; unpaired two-tailed Welch's t-test. **d-f**, *HIF2A* transcript levels in neutrophils (**d**), BMDMs (**e**), and alveolar epithelial cells (**f**) isolated from VE-cadherin Cre<sup>+</sup> and *LSL-HIF2dPA* VE-cadherin Cre<sup>+</sup> mice. n = 5 mice/group; unpaired two-tailed t-tests. All samples are biologically independent. All data are mean  $\pm$  s.e.m.

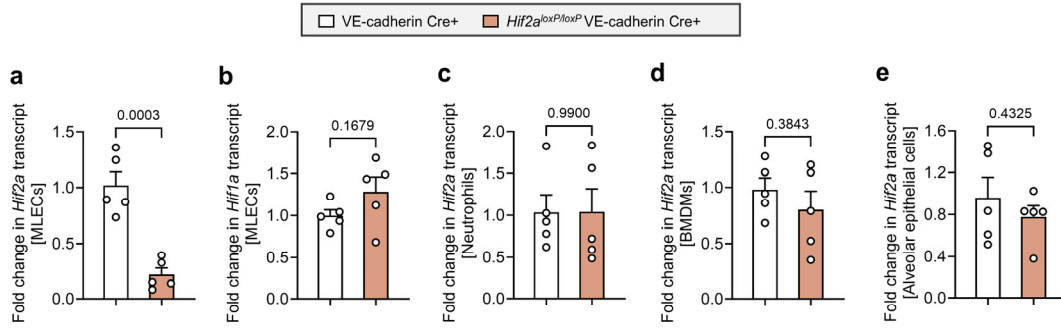

39

40 **Supplementary Fig. 3. Confirmation of endothelial-specific deletion of *Hif2a* in**  
 41 ***Hif2a*<sup>loxP/loxP</sup> VE-cadherin Cre<sup>+</sup> mice.**

42 **a and b, *Hif2a* (a) and *Hif1a* (b) transcript levels in MLECs isolated from VE-cadherin Cre<sup>+</sup>**  
 43 **and *Hif2a*<sup>loxP/loxP</sup> VE-cadherin Cre<sup>+</sup> mice. **c–e, *Hif2a* transcript levels in neutrophils (c),**  
 44 **BMDMs (d), and alveolar epithelial cells (e) isolated from VE-cadherin Cre<sup>+</sup> and *Hif2a*<sup>loxP/loxP</sup>**  
 45 **VE-cadherin Cre<sup>+</sup> mice. n = 5 mice/group; unpaired two-tailed t-tests. All samples are**  
 46 **biologically independent. All data are mean ± s.e.m.****

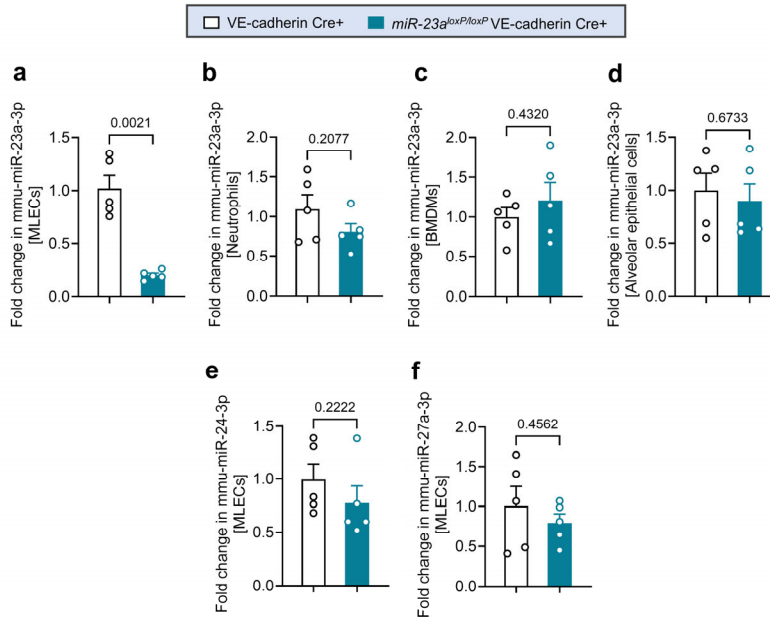

47

48 **Supplementary Fig. 4. Confirmation of endothelial-specific deletion of miR-23a in *miR-***  
 49 ***23a<sup>loxP/loxP</sup>* VE-cadherin Cre<sup>+</sup> mice.**

50 **a–d**, Real-time PCR analysis of mature mmu-miR-23a-3p levels in isolated MLECs (**a**),  
 51 neutrophils (**b**), BMDMs (**c**), and alveolar epithelial cells (**d**) from VE-cadherin Cre<sup>+</sup> and *miR-*  
 52 *23a<sup>loxP/loxP</sup>* VE-cadherin Cre<sup>+</sup> mice. **e** and **f**, mmu-miR-24-3p (**e**) and mmu-miR-27a-3p (**f**)  
 53 levels in isolated MLECs from VE-cadherin Cre<sup>+</sup> and *miR-23a<sup>loxP/loxP</sup>* VE-cadherin Cre<sup>+</sup> mice.  
 54 n = 5 mice/group; Welch's t-test was used for **a**, Mann-Whitney U test for **e**, and unpaired two-  
 55 tailed t-tests were used for **b–d** and **f**. All samples are biologically independent. All data are  
 56 mean ± s.e.m.

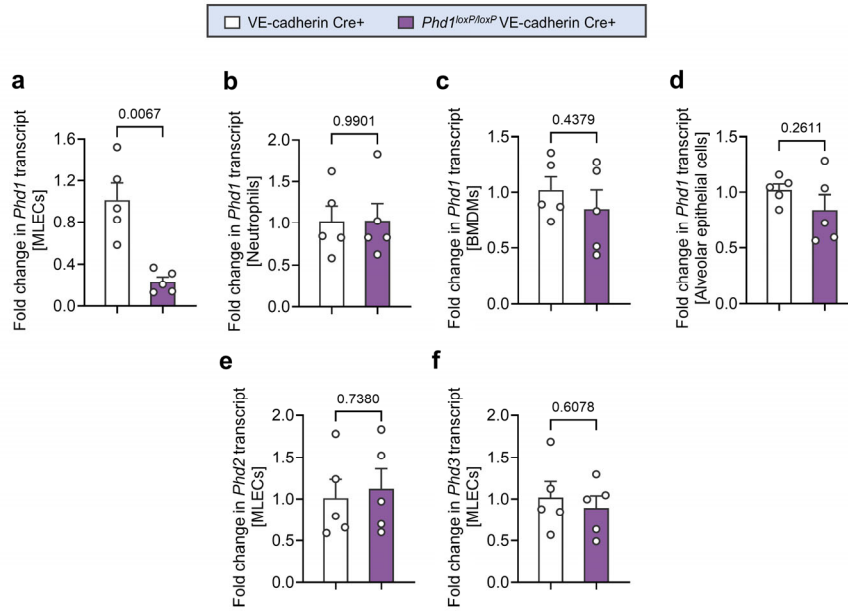

57

58 **Supplementary Fig. 5. Confirmation of endothelial-specific deletion of *Phd1* in**  
 59 ***Phd1<sup>loxP/loxP</sup>* VE-cadherin Cre+ mice.**

60 **a–d**, Real-time PCR analysis of *Phd1* transcript levels in isolated MLECs (**a**),  
 61 neutrophils (**b**), BMDMs (**c**), and alveolar epithelial cells (**d**) from VE-cadherin Cre+ and *Phd1<sup>loxP/loxP</sup>* VE-  
 62 cadherin Cre+ mice. **e** and **f**, *Phd2* (**e**) and *Phd3* (**f**) transcript levels in isolated MLECs from  
 63 VE-cadherin Cre+ and *Phd1<sup>loxP/loxP</sup>* VE-cadherin Cre+ mice. n = 5 mice/group; Welch's t-test  
 64 was used for **a**, and unpaired two-tailed t-tests were used for **b–f**. All samples are biologically  
 65 independent. All data are mean ± s.e.m.

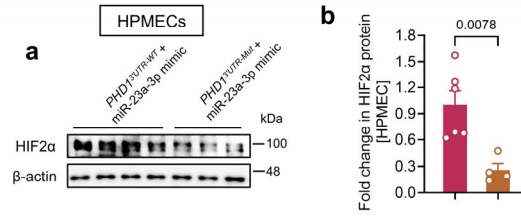

66

67 **Supplementary Fig. 6. Disruption of the miR-23a-3p-responsive site in the *PHD1* 3' UTR**  
 68 **attenuates HIF2α accumulation.**

69 HIF2α protein levels in HPMECs expressing *PHD1*<sup>3'UTR-WT</sup> or *PHD1*<sup>3'UTR-Mut</sup> after miR-23a-3p  
 70 mimic treatment. **a**, Western blot. **b**, Quantification. n = 6 *PHD1*<sup>3'UTR-WT</sup> and n = 4 *PHD1*<sup>3'UTR-</sup>  
 71 *Mut* biologically independent experiments; unpaired two-tailed t-test. All data are mean ± s.e.m.

72 **Supplementary Note 2: Supplementary Tables**73 **Supplementary Table 1. Clinicopathologic characteristics and experimental use of human**  
74 **lung specimens**

| Variable                                     | Non-involved distal lung                                                                                                                                                                                  | Inflamed lung                                                                                                                                                                                                                                                                           |
|----------------------------------------------|-----------------------------------------------------------------------------------------------------------------------------------------------------------------------------------------------------------|-----------------------------------------------------------------------------------------------------------------------------------------------------------------------------------------------------------------------------------------------------------------------------------------|
| <b>Patient-level characteristics</b>         |                                                                                                                                                                                                           |                                                                                                                                                                                                                                                                                         |
| Number of subjects, n                        | 6                                                                                                                                                                                                         | 6                                                                                                                                                                                                                                                                                       |
| Number of analyzed specimens/cases, n        | 6                                                                                                                                                                                                         | 6                                                                                                                                                                                                                                                                                       |
| Paired non-involved/inflamed specimens, n    | 0                                                                                                                                                                                                         | 0                                                                                                                                                                                                                                                                                       |
| Age, years, median (IQR)                     | 57.5 (52–63)                                                                                                                                                                                              | 54.5 (48–58)                                                                                                                                                                                                                                                                            |
| Sex, male/female                             | 4/2                                                                                                                                                                                                       | 3/3                                                                                                                                                                                                                                                                                     |
| Smoking status, never/former/current/unknown | 2/3/1/0                                                                                                                                                                                                   | 2/2/2/0                                                                                                                                                                                                                                                                                 |
| Clinical diagnosis, n (%)                    | Localized primary lung tumor, 6 (100%)                                                                                                                                                                    | Pulmonary inflammatory or infectious lesion, 6 (100%): pneumonia/inflammatory mass, 2 (33.3%); lung abscess, 1 (16.7%); bronchiectasis with active inflammation, 2 (33.3%); acute exacerbation of interstitial lung disease, 1 (16.7%)                                                  |
| Pathological diagnosis, n (%)                | Histologically non-involved distal lung parenchyma from localized primary lung tumor resection specimens, 6 (100%); source tumor histology: adenocarcinoma, 4 (66.7%); squamous cell carcinoma, 2 (33.3%) | Active or recent inflammatory lung injury, 6 (100%): organizing pneumonia/active inflammatory injury, 2 (33.3%); suppurative inflammatory injury, 1 (16.7%); bronchiectasis with active inflammation, 2 (33.3%); interstitial pneumonia with acute inflammatory exacerbation, 1 (16.7%) |
| <b>Specimen-level characteristics</b>        |                                                                                                                                                                                                           |                                                                                                                                                                                                                                                                                         |
| Anatomic site of resection                   | Upper lobe, 3; lower lobe, 3                                                                                                                                                                              | Upper lobe, 2; right middle lobe/lingular segment, 1;                                                                                                                                                                                                                                   |

| <b>Variable</b>                          | <b>Non-involved distal lung</b>                                                                                                                               | <b>Inflamed lung</b>                                                                                                                                         |
|------------------------------------------|---------------------------------------------------------------------------------------------------------------------------------------------------------------|--------------------------------------------------------------------------------------------------------------------------------------------------------------|
|                                          |                                                                                                                                                               | lower lobe, 3                                                                                                                                                |
| Indication for tissue acquisition        | Clinically indicated surgical resection for localized primary lung tumor; distal non-involved parenchyma was sampled as comparator tissue                     | Clinically indicated thoracic surgery or surgical resection for pulmonary inflammatory or infectious lesions                                                 |
| Histological criteria for classification | Grossly and microscopically non-involved distal alveolar parenchyma, remote from tumor margin, without tumor infiltration or overt acute/chronic inflammation | Lung tissue with histological evidence of active or recent inflammatory injury, including inflammatory cell infiltration and inflammatory parenchymal injury |
| Specimen type, fresh-frozen/FFPE/both    | 0/0/6                                                                                                                                                         | 0/0/6                                                                                                                                                        |
| <b>Experimental use</b>                  |                                                                                                                                                               |                                                                                                                                                              |
| Use in bulk RNA/protein analysis, n      | 6                                                                                                                                                             | 6                                                                                                                                                            |
| Use in miRNAscope/IF analysis, n         | 6                                                                                                                                                             | 6                                                                                                                                                            |

75 Data are presented as n, n (%) or median (IQR), as appropriate. FFPE, formalin-fixed paraffin-  
76 embedded; IF, immunofluorescence. Non-involved distal lung refers to histologically  
77 uninvolved lung parenchyma distant from the primary lesion. Inflamed lung refers to lung  
78 tissue with histological evidence of active or recent inflammatory injury. Number of analyzed  
79 specimens/cases refers to biologically independent subjects rather than separate tissue blocks  
80 or aliquots. Paired non-involved/inflamed specimens refers to matched comparator and  
81 inflamed lung tissues obtained from the same subject.

82 **Supplementary Table 2. Consensus mmu-miR-23a-3p candidate target genes identified**  
 83 **across four target resources. Provided as a separate Excel file.**

84 **Supplementary Table 3. Complete mmu-miR-23a-3p target-prediction matrix across**  
 85 **miRanda, miRDB, TargetScan and CLIP-supported datasets. Provided as a separate**  
 86 **Excel file.**

87 **Supplementary Table 4. miR-23a-3p candidate target network and confidence annotation.**  
 88 **Provided as a separate Excel file.**

89 **Supplementary Table 5. Key resources table**

| REAGENT or RESOURCE                                              | SOURCE                    | IDENTIFIER       |
|------------------------------------------------------------------|---------------------------|------------------|
| <b>Antibodies</b>                                                |                           |                  |
| Anti-HIF1 $\alpha$ antibody, rabbit monoclonal, clone BL-124-3F7 | Bethyl Laboratories       | Cat # A700-001   |
| Anti-HIF1 $\alpha$ antibody, mouse monoclonal, clone H1alpha67   | Novus Biologicals         | Cat # NB100-105  |
| Anti-HIF2 $\alpha$ antibody, rabbit monoclonal, clone BL-95-1A2  | Bethyl Laboratories       | Cat # A700-003   |
| Anti-HIF2 $\alpha$ antibody, rabbit polyclonal                   | Novus Biologicals         | Cat # NB100-122  |
| Anti-PHD1 antibody, rabbit polyclonal                            | Proteintech               | Cat # 12984-1-AP |
| Anti-CD31 antibody, goat polyclonal                              | R&D Systems               | Cat # AF3628     |
| Anti- $\alpha$ -tubulin antibody, rabbit polyclonal              | Cell Signaling Technology | Cat # 2144       |
| Anti- $\beta$ -actin antibody, mouse monoclonal, clone C4        | Santa Cruz                | Cat # sc-47778   |
| Anti-GAPDH antibody, rabbit monoclonal, clone D16H11             | Cell Signaling Technology | Cat # 5174       |
| Lamin A/C, Mouse Monoclonal, clone 4C11                          | Cell Signaling Technology | Cat # 4777       |
| Anti-mouse Ly6G antibody, clone 1A8                              | Bio X Cell                | Cat # BE0075-1   |
| Rat IgG2a isotype control antibody, clone 2A3                    | Bio X Cell                | Cat # BE0089     |
| TruStain FcX anti-mouse CD16/32 antibody, clone 93               | BioLegend                 | Cat # 101320     |
| B220-Alexa Fluor 488 antibody, clone RA3-6B2                     | BioLegend                 | Cat # 103228     |
| CD3-FITC antibody, clone 17A2                                    | BioLegend                 | Cat # 100203     |
| Ly6G-APC/Cyanine7 antibody, clone 1A8                            | BioLegend                 | Cat # 127623     |
| CD11b-Pacific Blue antibody, clone M1/70                         | BioLegend                 | Cat # 101223     |
| CD11c-PE antibody, clone N418                                    | BioLegend                 | Cat # 117307     |
| Biotin anti-mouse CD16/CD32 antibody, clone 2.4G2                | BD Biosciences            | Cat # 553143     |
| Biotin anti-mouse TER-119 antibody, clone TER-119                | BD Biosciences            | Cat # 553672     |

|                                                                        |                                     |                                                                                                                |
|------------------------------------------------------------------------|-------------------------------------|----------------------------------------------------------------------------------------------------------------|
| Biotin anti-mouse CD45 antibody, clone 30-F11                          | BD Biosciences                      | Cat # 553078                                                                                                   |
| Biotin anti-mouse CD90.2 antibody, clone 30-H12                        | BD Biosciences                      | Cat # 553011                                                                                                   |
| Alexa Fluor 594 donkey anti-goat IgG secondary antibody                | Invitrogen/Thermo Fisher Scientific | Cat # A-11058                                                                                                  |
| Alexa Fluor 488 donkey anti-rabbit IgG secondary antibody              | Invitrogen/Thermo Fisher Scientific | Cat # A-21206                                                                                                  |
| Alexa Fluor 488 donkey anti-mouse IgG secondary antibody               | Invitrogen/Thermo Fisher Scientific | Cat # A-21202                                                                                                  |
| Rabbit monoclonal IgG isotype control, clone EPR25A                    | Abcam                               | Cat # ab172730                                                                                                 |
| Mouse monoclonal IgG1 isotype control, clone G3A1                      | Cell Signaling Technology           | Cat # 5415                                                                                                     |
| HRP-linked anti-rabbit IgG secondary antibody                          | Cell Signaling Technology           | Cat # 7074                                                                                                     |
| HRP-linked anti-mouse IgG secondary antibody                           | Cell Signaling Technology           | Cat # 7076                                                                                                     |
| <b>Cell lines and primary cells</b>                                    |                                     |                                                                                                                |
| HEK293 cells                                                           | ATCC                                | CRL-1573                                                                                                       |
| Human pulmonary microvascular endothelial cells (HPMECs)               | ScienCell                           | Cat # 3000                                                                                                     |
| Human pulmonary arterial endothelial cells (HPAECs)                    | ScienCell                           | Cat # 3100                                                                                                     |
| <b>Experimental models: organisms/strains</b>                          |                                     |                                                                                                                |
| Mouse: C57BL/6-Tg(Cdh5-cre/ERT2)1Rha                                   | Taconic Biosciences                 | RRID:IMSR_TAC:13073                                                                                            |
| Mouse: B6(Cg)- <i>Mir23a</i> <sup>tm1.1Qj/J</sup>                      | The Jackson Laboratory              | RRID:IMSR_JAX:032430                                                                                           |
| Mouse: B6.129- <i>Hif1a</i> <sup>tm3Rsj/J</sup>                        | The Jackson Laboratory              | RRID:IMSR_JAX:007561                                                                                           |
| Mouse: STOCK <i>Epas1</i> <sup>tm1Mcs/J</sup>                          | The Jackson Laboratory              | RRID:IMSR_JAX:008407                                                                                           |
| Mouse: B6.129S6(C)- <i>Gt(ROSA)26Sor</i> <sup>tm3(HIF1A*)Kael/J</sup>  | The Jackson Laboratory              | RRID:IMSR_JAX:009673                                                                                           |
| Mouse: STOCK <i>Gt(ROSA)26Sor</i> <sup>tm4(HIF2A*)Kael/J</sup>         | The Jackson Laboratory              | RRID:IMSR_JAX:009674                                                                                           |
| Mouse: C57BL/6J <i>Cya-Egln2</i> <sup>em1flox/Cya</sup>                | Cyagen Biosciences                  | S-CKO-00922                                                                                                    |
| Mouse: B6.129P2(FVB)- <i>Lyz2</i> <sup>tm1(cre/ERT2)Grm/J</sup>        | The Jackson Laboratory              | RRID:IMSR_JAX:032291                                                                                           |
| Mouse: B6.129S- <i>Sftpctm1</i> <sup>(cre/ERT2)Blh/J</sup>             | The Jackson Laboratory              | RRID:IMSR_JAX:028054                                                                                           |
| Mouse: FVB.129S6- <i>Gt(ROSA)26Sor</i> <sup>tm2(HIF1A/luc)Kael/J</sup> | The Jackson Laboratory              | RRID:IMSR_JAX:006206                                                                                           |
| Mouse: Rosa26 <sup>LSL-Phd1-3' UTR-WT</sup>                            | Cyagen Biosciences                  | Custom C57BL/6 Cre-inducible <i>Phd1</i> 3' UTR-WT knock-in line; no public catalog number                     |
| Mouse: Rosa26 <sup>LSL-Phd1-3' UTR-Mut</sup>                           | Cyagen Biosciences                  | Custom C57BL/6 Cre-inducible miR-23a-3p seed-mutant <i>Phd1</i> 3' UTR knock-in line; no public catalog number |

| <b>Recombinant DNA and viral vectors</b>                         |                                             |                                      |
|------------------------------------------------------------------|---------------------------------------------|--------------------------------------|
| pcDNA3 <i>mHIF-2<math>\alpha</math></i> MYC P405A/P530V/N851A    | Addgene                                     | Plasmid # 44027                      |
| pcDNA3 <i>mHIF-1<math>\alpha</math></i> MYC P402A/P577A/N813A    | Addgene                                     | Plasmid # 44028                      |
| AAV9-GFP-U6-scramble shRNA control (shCon)                       | Vector BioLabs                              | Cat # 7045                           |
| AAV-h-HIF1A-shRNA (shHIF1A), human                               | Vector BioLabs                              | Cat # shAAV-230457; packaged as AAV9 |
| AAV-h-EPAS1/HIF2A-shRNA (shHIF2A), human                         | Vector BioLabs                              | Cat # shAAV-207955; packaged as AAV9 |
| <b>Oligonucleotides and RNA reagents</b>                         |                                             |                                      |
| mirVana miRNA Mimic Negative Control #1                          | Thermo Fisher Scientific                    | Cat # 4464060                        |
| mirVana miRNA mimic, hsa/mmu/rno-miR-23a-3p                      | Thermo Fisher Scientific                    | Assay ID MC10644; Cat # 4464066      |
| TaqMan MicroRNA Assays                                           | Applied Biosystems/Thermo Fisher Scientific | Cat # 4427975                        |
| anti-miR-23a-3p LNA inhibitor, mouse                             | QIAGEN                                      | GeneGlobe ID: YI04103407             |
| hsa-miR-23a-3p LNA inhibitor                                     | QIAGEN                                      | GeneGlobe ID: YI04103406             |
| Negative control LNA miRNA Inhibitor                             | QIAGEN                                      | GeneGlobe ID: YI00199006             |
| <b>In situ hybridization probes</b>                              |                                             |                                      |
| miRNAscope LS Probe SR-hsa-miR-23a-3p-S1                         | Advanced Cell Diagnostics (ACD)/Bio-Techne  | Cat # 893318-S1                      |
| <b>Chemicals, drugs and commercial reagents</b>                  |                                             |                                      |
| Lipopolysaccharide from Escherichia coli O111:B4                 | Sigma-Aldrich                               | Cat # L4391                          |
| Tamoxifen                                                        | Cayman Chemical                             | Cat # 13258                          |
| Corn oil                                                         | Sigma-Aldrich                               | Cat # C8267                          |
| Roxadustat/FG-4592                                               | MedChemExpress                              | Cat # HY-13426                       |
| Carboxymethylcellulose sodium salt                               | Sigma-Aldrich                               | Cat # C5678                          |
| Clodronate liposomes with PBS control liposomes                  | Liposoma BV                                 | Cat # CP-005-005                     |
| 1,2-dioleoyl-sn-glycero-3-phosphocholine (DOPC)                  | Avanti Polar Lipids                         | Cat # 850375                         |
| 14:0 PEG2000 PE / C14-PEG2000                                    | Avanti Polar Lipids                         | Cat # 880150                         |
| Sevoflurane, USP                                                 | Baxter Healthcare                           | Cat # NDC 10019-653-64               |
| Ethiqa XR (buprenorphine extended-release injectable suspension) | Fidelis Animal Health                       | Cat # NDC 86084-100-30               |
| Sterile saline                                                   | Baxter Healthcare                           | Cat # 2B1307                         |
| DAPI                                                             | Thermo Fisher Scientific                    | Cat # D1306                          |
| Antifade mounting medium                                         | Thermo Fisher Scientific                    | Cat # P36930                         |

|                                                                        |                                     |                  |
|------------------------------------------------------------------------|-------------------------------------|------------------|
| Sterile PBS, pH 7.4, without calcium or magnesium                      | Gibco/Thermo Fisher Scientific      | Cat # 10010023   |
| HBSS with calcium and magnesium, no phenol red                         | Gibco/Thermo Fisher Scientific      | Cat # 14025092   |
| Collagenase Type I                                                     | Worthington Biochemical Corporation | Cat # LS004196   |
| Bovine serum albumin (BSA)                                             | Sigma-Aldrich                       | Cat # A9647      |
| Dispase, 5 U/ml                                                        | STEMCELL Technologies               | Cat # 07913      |
| Low-melting-point agarose                                              | Sigma-Aldrich                       | Cat # A9414      |
| DNase I                                                                | Sigma-Aldrich                       | Cat # DN25       |
| RBC Lysis Buffer, 10×                                                  | BioLegend                           | Cat # 420301     |
| ACK Lysing Buffer                                                      | Gibco/Thermo Fisher Scientific      | Cat # A1049201   |
| DMEM, high glucose                                                     | Gibco/Thermo Fisher Scientific      | Cat # 11965092   |
| Heat-inactivated fetal bovine serum                                    | GenDEPOT                            | Cat # F0601-050  |
| Heat-inactivated fetal bovine serum for FACS buffer                    | Gibco/Thermo Fisher Scientific      | Cat # 16140071   |
| Penicillin–streptomycin                                                | Gibco/Thermo Fisher Scientific      | Cat # 15140122   |
| Recombinant murine M-CSF                                               | Thermo Fisher Scientific            | Cat # 315-02     |
| Dimethyloxalylglycine (DMOG)                                           | Sigma-Aldrich                       | Cat # D3695      |
| 7C1 polymer                                                            | Clearsynth                          | Cat # CS-O-49308 |
| tert-Butanol                                                           | Sigma-Aldrich                       | Cat # 471712     |
| Tween-20                                                               | Sigma-Aldrich                       | Cat # P9416      |
| Recombinant human TNF- $\alpha$                                        | R&D Systems/Bio-Techne              | Cat # 210-TA     |
| Lipofectamine RNAiMAX Transfection Reagent                             | Invitrogen/Thermo Fisher Scientific | Cat # 13778075   |
| Lipofectamine 3000 Transfection Reagent                                | Invitrogen/Thermo Fisher Scientific | Cat # L3000015   |
| FITC-dextran, 70 kDa                                                   | Sigma-Aldrich                       | Cat # 46945      |
| Rat tail collagen I                                                    | Corning                             | Cat # 354236     |
| EDTA                                                                   | Invitrogen/Thermo Fisher Scientific | Cat # 15575020   |
| K2-EDTA-coated microcollection tubes                                   | BD Microtainer / Becton Dickinson   | Cat # 365974     |
| Fisher Healthcare PROTOCOL Hema 3 Manual Staining System and Stat Pack | Fisher Scientific                   | Cat # 22-122911  |
| TRIzol Reagent                                                         | Invitrogen/Thermo Fisher Scientific | Cat # 15596026   |
| 10% neutral-buffered formalin                                          | Sigma-Aldrich                       | Cat # HT501128   |
| IVISbrite D-Luciferin RediJect Solution, 30 mg/ml                      | Revvity                             | Cat # 770504     |

|                                                       |                                             |                   |
|-------------------------------------------------------|---------------------------------------------|-------------------|
| RIPA Lysis and Extraction Buffer                      | Thermo Fisher Scientific                    | Cat # 89900       |
| Protease Inhibitor Cocktail                           | Thermo Fisher Scientific                    | Cat # 78425       |
| Phosphatase Inhibitor Cocktail                        | Thermo Fisher Scientific                    | Cat # 78420       |
| Pierce BCA Protein Assay Kit                          | Thermo Fisher Scientific                    | Cat # 23225       |
| Paraformaldehyde                                      | Millipore Sigma                             | Cat # P6148       |
| Heparin                                               | StemCell Technologies                       | Cat # 07980       |
| Trypsin-EDTA                                          | Thermo Fisher Scientific                    | Cat # 15400054    |
| PVDF membrane                                         | Millipore                                   | Cat # IPVH00010   |
| 4-0 nylon suture                                      | Ethicon                                     | Cat # 1662G       |
| 21 G needle                                           | BD Biosciences                              | Cat # 305165      |
| Criterion XT Bis-Tris Protein Gel                     | Bio-Rad                                     | Cat # 3450124     |
| CD45 MicroBeads, mouse                                | Miltenyi Biotec                             | Cat # 130-052-301 |
| CD146 (LSEC) MicroBeads, mouse                        | Miltenyi Biotec                             | Cat # 130-092-007 |
| FcR Blocking Reagent, mouse                           | Miltenyi Biotec                             | Cat # 130-092-575 |
| LD Columns                                            | Miltenyi Biotec                             | Cat # 130-042-901 |
| LS Columns                                            | Miltenyi Biotec                             | Cat # 130-042-401 |
| Pre-Separation Filters, 30 µm                         | Miltenyi Biotec                             | Cat # 130-041-407 |
| 70-µm cell strainer                                   | Falcon                                      | Cat # 352350      |
| ECL substrate                                         | Thermo Fisher Scientific                    | Cat # 34580       |
| <b>Kits and commercial assays</b>                     |                                             |                   |
| Endothelial Cell Medium kit                           | ScienCell Research Laboratories             | Cat # 1001        |
| MycoAlert Mycoplasma Detection Kit                    | Lonza                                       | Cat # LT07-318    |
| EasySep Mouse Streptavidin RapidSpheres               | STEMCELL Technologies                       | Cat # 19860       |
| EasySep Magnet                                        | STEMCELL Technologies                       | Cat # 18000       |
| RNeasy Mini Kit                                       | QIAGEN                                      | Cat # 74106       |
| miRNeasy Mini Kit                                     | QIAGEN                                      | Cat # 217004      |
| High-Capacity cDNA Reverse Transcription Kit          | Applied Biosystems/Thermo Fisher Scientific | Cat # 4368814     |
| QuantiTect SYBR Green PCR Kit                         | QIAGEN                                      | Cat # 204145      |
| TaqMan MicroRNA Reverse Transcription Kit             | Applied Biosystems/Thermo Fisher Scientific | Cat # 4366596     |
| TaqMan Universal PCR Master Mix, no AmpErase UNG      | Applied Biosystems/Thermo Fisher Scientific | Cat # 4324018     |
| RNAscope Plus smRNA-RNA LS Reagents Kit               | Advanced Cell Diagnostics (ACD)/Bio-Techne  | Cat # 322786      |
| SimpleChIP Enzymatic Chromatin IP Kit (Agarose Beads) | Cell Signaling Technology                   | Cat # 9002        |
| Secrete-Pair Dual Luminescence Assay Kit              | GeneCopoeia                                 | Cat # LF031       |
| Mouse Albumin ELISA Kit                               | Bethyl Laboratories                         | Cat # E99-134     |

|                                                         |                              |                                  |
|---------------------------------------------------------|------------------------------|----------------------------------|
| Mouse IL-1 $\beta$ /IL-1F2 Quantikine ELISA Kit         | R&D Systems/Bio-Techne       | Cat # MLB00C                     |
| Mouse IL-6 Quantikine ELISA Kit                         | R&D Systems/Bio-Techne       | Cat # M6000B                     |
| Mouse/Rat Angiopoietin-2 Quantikine ELISA Kit           | R&D Systems/Bio-Techne       | Cat # MANG20                     |
| Mouse Syndecan-1/CD138 ELISA Kit                        | Novus Biologicals/Bio-Techne | Cat # NBP2-76610                 |
| Mouse Thrombomodulin/BDCA-3 Quantikine ELISA Kit        | R&D Systems/Bio-Techne       | Cat # MTHBD0                     |
| Transwell inserts, 0.4- $\mu$ m pore polyester membrane | Corning                      | Cat # 3470                       |
| <b>Software and algorithms</b>                          |                              |                                  |
| Fiji/ImageJ                                             | NIH                          | Fiji version 2.1.0               |
| GraphPad Prism                                          | GraphPad Software            | Version 10.0 or later            |
| QIAGEN Ingenuity Pathway Analysis (IPA)                 | QIAGEN Digital Insights      | Accessed 2021                    |
| TargetScan                                              | TargetScan                   | miRNA target-prediction resource |
| miRanda                                                 | miRanda                      | miRNA target-prediction resource |
| miRDB                                                   | miRDB                        | miRNA target-prediction resource |
| Gen5 software                                           | BioTek/Agilent               | Used with Cytation 5 reader      |

91 **Supplementary Table 6. qPCR assay and primer information**

| Species     | Target                   | Assay ID or primer sequence (5'-3')                           |
|-------------|--------------------------|---------------------------------------------------------------|
| Human/mouse | miR-23a-3p               | Assay ID: 000399;<br>Mature sequence: AUCACAUUGCCAGGGAUUUCC   |
| Human/mouse | miR-23a-5p               | Assay ID: 002439;<br>Mature sequence: GGGGUUCCUGGGGAUGGGAAUUU |
| Human/mouse | miR-27a-3p               | Assay ID: 000408;<br>Mature sequence: UUCACAGUGGCUAAGUUCGCG   |
| Human/mouse | miR-27a-5p               | Assay ID: 002445;<br>Mature sequence: AGGGCUUAGCUGCUUGUGAGCA  |
| Human/mouse | miR-24-3p                | Assay ID: 000402;<br>Mature sequence: UGGCUCAGUUCAGCAGGAACAG  |
| Human/mouse | U6 snRNA                 | Assay ID: 001973                                              |
| Human       | <i>ACTB</i>              | F: CACCATTGGCAATGAGCGGTTC<br>R: AGGTCTTTGCGGATGTCCACGT        |
| Mouse       | <i>Actb</i>              | F: CATTGCTGACAGGATGCAGAAGG<br>R: TGCTGGAAGGTGGACAGTGAGG       |
| Human       | <i>HIF1A</i>             | F: TATGAGCCAGAAGAAGCTTTTAGGC<br>R: CACCTCTTTTGGCAAGCATCCTG    |
| Mouse       | <i>Hif1a</i>             | F: CCTGCACTGAATCAAGAGGTTGC<br>R: CCATCAGAAGGACTTGCTGGCT       |
| Human       | <i>EPAS1/HIF2A</i>       | F: CTGTGTCTGAGAAGAGTAACTTCC<br>R: TTGCCATAGGCTGAGGACTCCT      |
| Mouse       | <i>Epas1/Hif2a</i>       | F: GGACAGCAAGACTTTCCTGAGC<br>R: GGTAGAACTCATAGGCAGAGCG        |
| Human       | <i>EGLN1/PHD2</i>        | F: TGAGCAGCATGGACGACCTGAT<br>R: CGTACATAACCCGTTCCATTGCC       |
| Mouse       | <i>Egln1/Phd2</i>        | F: TGAGCAGCATGGACGACCTGAT<br>R: GACATAGCCTGTTCCGTTGCCT        |
| Human       | <i>EGLN2/PHD1</i>        | F: CTGTCTGGTATTTTGATGCCAAGG<br>R: CGGCTGTGATACAGGTAATTGG      |
| Mouse       | <i>Egln2/Phd1</i>        | F: ATGGCTCACGTGGACGCGAGTAA<br>R: CATTGCCTGGATAACACGCCAC       |
| Human       | <i>EGLN3/PHD3</i>        | F: GAACAGGTTATGTTCCGCCACGTG<br>R: CCTCTGGAAATATCCGCAGGA       |
| Mouse       | <i>Egln3/Phd3</i>        | F: CAACTTCTCCTGTCCCTCATC<br>R: CCTGGATAGCAAGCCACCATTG         |
| Human       | pri-hsa-miR-23a~27a~24-2 | F: GTGTGGTGGCTCCTGCATAT<br>R: CACCTGGAGGGGAGAAAGAG            |

| Species | Target                                    | Assay ID or primer sequence (5'-3')               |
|---------|-------------------------------------------|---------------------------------------------------|
| Mouse   | pri-mmu-miR-23a~27a~24-2 locus<br>readout | F: CTACACTCCGCTCCCACC<br>R: TTGTGACTGGCATCAAATCC  |
| Human   | pre-hsa-miR-23a<br>readout                | F: CTGGGGTTCCTGGGGAT<br>R: TGGTAATCCCTGGCAATGTG   |
| Human   | pre-hsa-miR-27a<br>readout                | F: GCAGGGCTTAGCTGCTTG<br>R: GCGGAACTTAGCCACTGT    |
| Human   | pre-hsa-miR-24-2<br>readout               | F: CTCCCGTGCCTACTGAGCT<br>R: CCCTGTTCTGCTGAACTGAG |
| Mouse   | pre-mmu-miR-23a<br>readout                | F: CTGGGGATGGGATTTGCT<br>R: GCACAGGGTCAGTTGAAAAT  |
| Mouse   | pre-mmu-miR-27a<br>readout                | F: GCAGGGCTTAGCTGCTTG<br>R: GCGGAACTTAGCCACTGT    |
| Mouse   | pre-mmu-miR-24-2<br>readout               | F: CTCCCGTGCCTACTGAGCT<br>R: CCCTGTTCTGCTGAACTGAG |

93 **Supplementary Note 3: Uncropped gel blot images for main Figures**

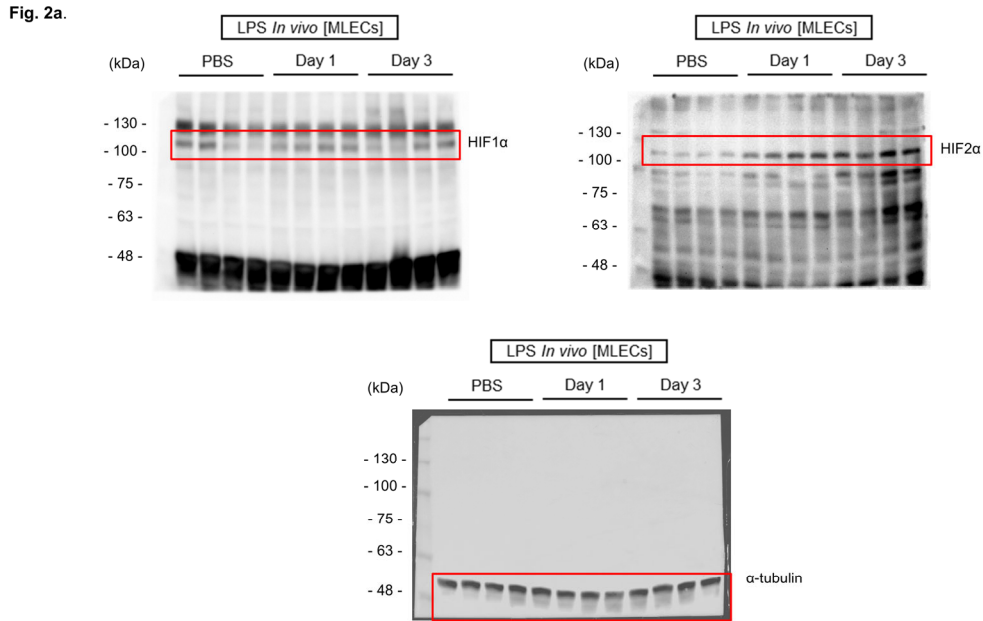

94  
95  
96  
97  
98  
99

**Uncropped western blot (WB) images for Fig. 2a.** HIF1 $\alpha$  and HIF2 $\alpha$  protein levels in MLECs isolated from mice treated with intratracheal PBS or LPS (n = 4 biological replicates). Samples were run on the same gels, with  $\alpha$ -tubulin as a loading control.

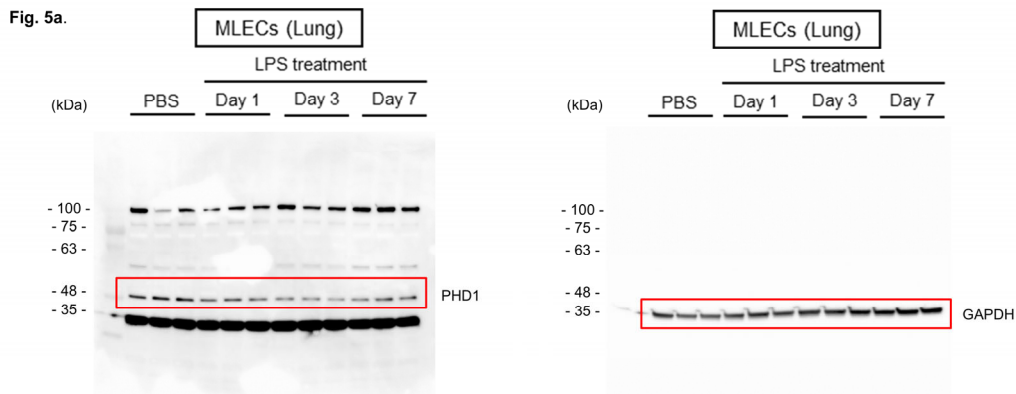

100  
101  
102  
103

**Uncropped WB images for Fig. 5a.** PHD1 expression in MLECs isolated from mice treated with intratracheal PBS or LPS (n = 3 biological replicates). Samples were run on the same gels, with GAPDH as a loading control.

Fig. 5f.

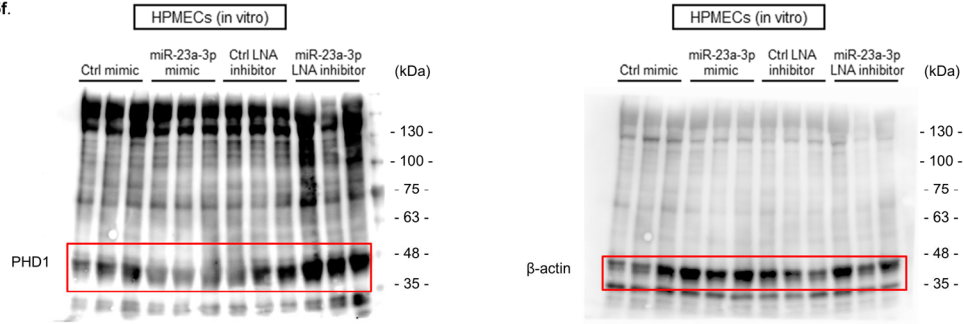

104

105

106

107

108

109

110

**Uncropped WB images for Fig. 5f.** PHD1 protein levels in HPMECs transfected with control or miR-23a-3p mimic, or treated with control LNA inhibitor or anti-miR-23a-3p LNA inhibitor (n = 3 biological replicates). Samples were run on the same gels, with  $\beta$ -actin as a loading control.

Fig. 5m.

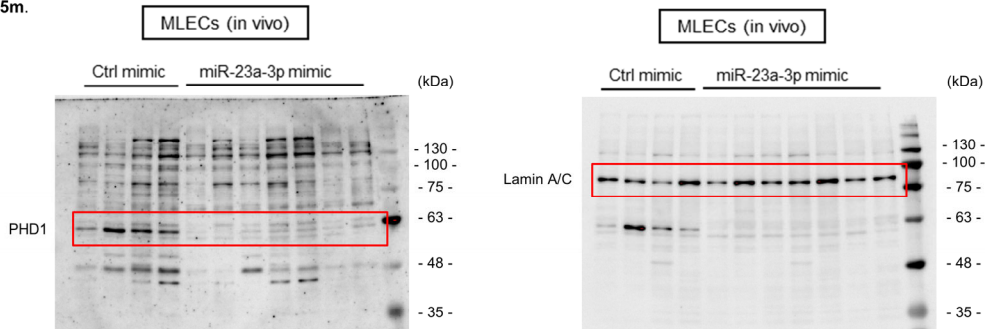

111

112

113

114

115

116

**Uncropped WB images for Fig. 5m.** MLECs isolated on day 3 after LPS challenge from mice treated with control mimic or miR-23a-3p mimic, and PHD1 protein levels were measured by WB (n = 4 biological replicates for control mimic treated mice and n = 7 biological replicates for miR-23a-3p mimic treated mice). Samples were run on the same gels, with Lamin A/C as a loading control.

Fig. 5o.

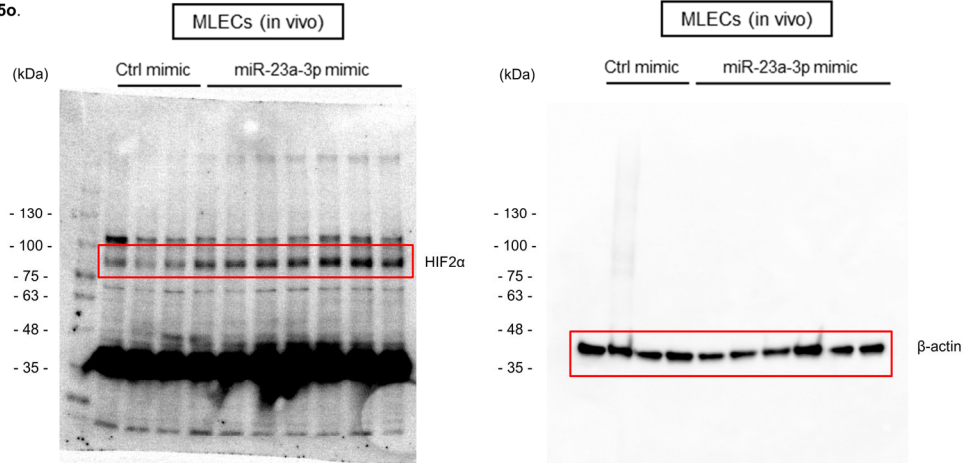

117  
118  
119  
120  
121  
122  
123  
124

**Uncropped WB images for Fig. 5o.** MLECs isolated on day 3 after LPS challenge from mice treated with control mimic or miR-23a-3p mimic, and HIF2 $\alpha$  protein levels were measured by WB (n = 3 biological replicates for control mimic treated mice and n = 7 biological replicates for miR-23a-3p mimic treated mice). Samples were run on the same gels, with  $\beta$ -actin as a loading control.

Fig. 5r.

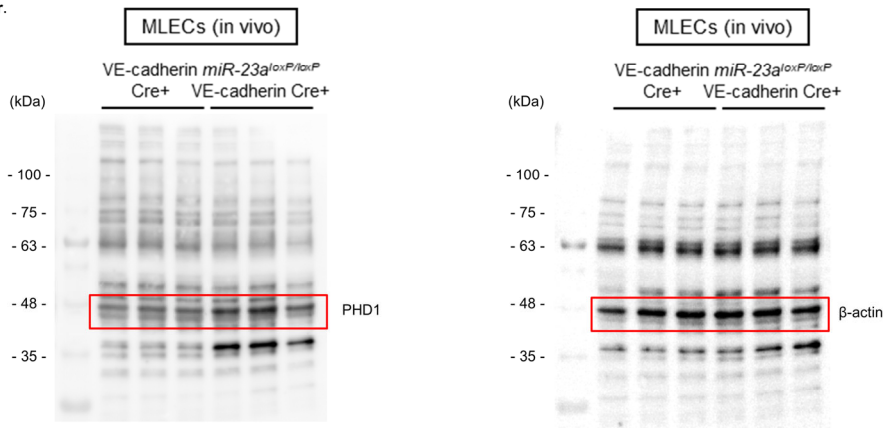

125  
126  
127  
128  
129

**Uncropped WB images for Fig. 5r.** MLECs isolated on day 3 after LPS challenge from VE-cadherin Cre<sup>+</sup> and miR-23a<sup>loxP/loxP</sup> VE-cadherin Cre<sup>+</sup> mice, and PHD1 protein levels were measured by WB (n = 3 biological replicates). Samples were run on the same gels, with  $\beta$ -actin as a loading control.

Fig. 5t.

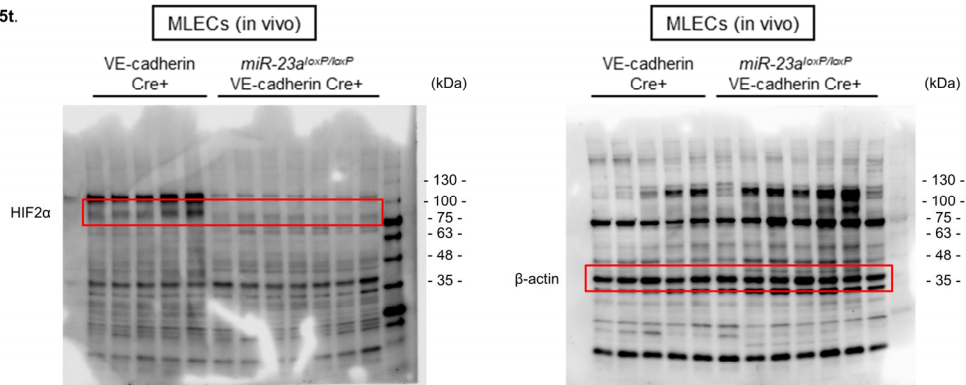

130

131 **Uncropped WB images for Fig. 5t.** MLECs isolated on day 3 after LPS challenge from VE-  
132 cadherin Cre<sup>+</sup> and *miR-23a*<sup>loxP/loxP</sup> VE-cadherin Cre<sup>+</sup> mice, and HIF2α protein levels were  
133 measured by WB (n = 5 biological replicates for VE-cadherin Cre<sup>+</sup> mice and n = 7 biological  
134 replicates for *miR-23a*<sup>loxP/loxP</sup> VE-cadherin Cre<sup>+</sup> mice). Samples were run on the same gels,  
135 with β-actin as a loading control.

136

137

Fig. 6j.

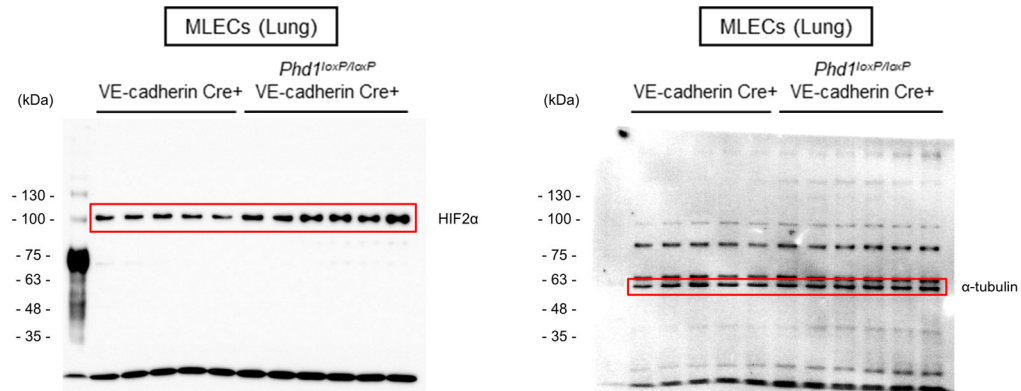

138

139 **Uncropped WB images for Fig. 6j.** VE-cadherin Cre<sup>+</sup> and *Phd1*<sup>loxP/loxP</sup> VE-cadherin Cre<sup>+</sup>  
140 mice were treated with intratracheal LPS, and HIF2α protein levels were measured by WB in  
141 isolated MLECs (n = 5 biological replicates for VE-cadherin Cre<sup>+</sup> mice and n = 6 biological  
142 replicates for *Phd1*<sup>loxP/loxP</sup> VE-cadherin Cre<sup>+</sup> mice). Samples were run on the same gels, with  
143 α-tubulin as a loading control.

Fig. 7b

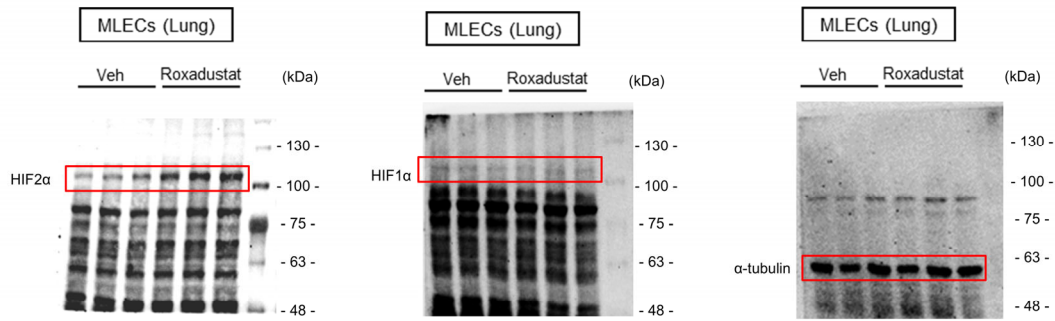

144

145 **Uncropped WB images for Fig. 7b.** C57BL/6J mice were treated with vehicle or roxadustat  
146 by oral gavage on consecutive days 1, 2 and 3 after intratracheal LPS challenge, and HIF1α,  
147 HIF2α protein levels were measured by WB in isolated MLECs (n = 3 biological replicates).  
148 Samples were run on the same gels, with α-tubulin as a loading control.

149

150

Fig. 8b.

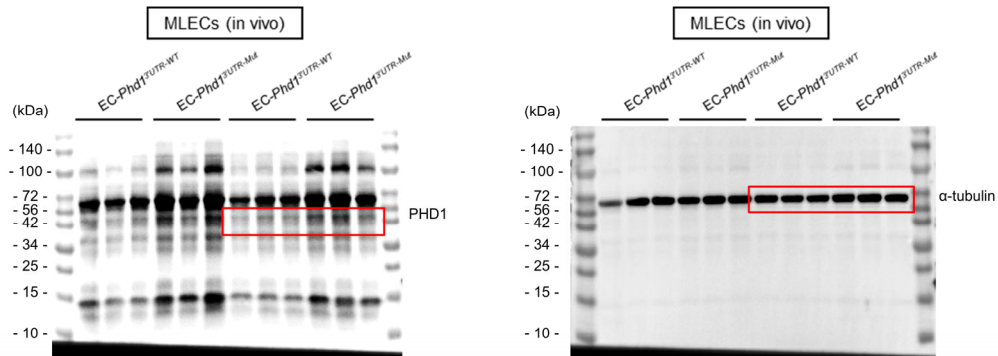

151

152 **Uncropped WB images for Fig. 8b.** EC-Phd1<sup>3'UTR-WT</sup> and EC-Phd1<sup>3'UTR-Mut</sup> mice were treated  
153 with DOPC-formulated miR-23a-3p mimic on consecutive days 1, 2 and 3 after intratracheal  
154 LPS challenge, and PHD1 protein levels were measured by WB in isolated MLECs (n = 6  
155 biological replicates). Samples were run on the same gels, with α-tubulin as a loading control.

Fig. 8f.

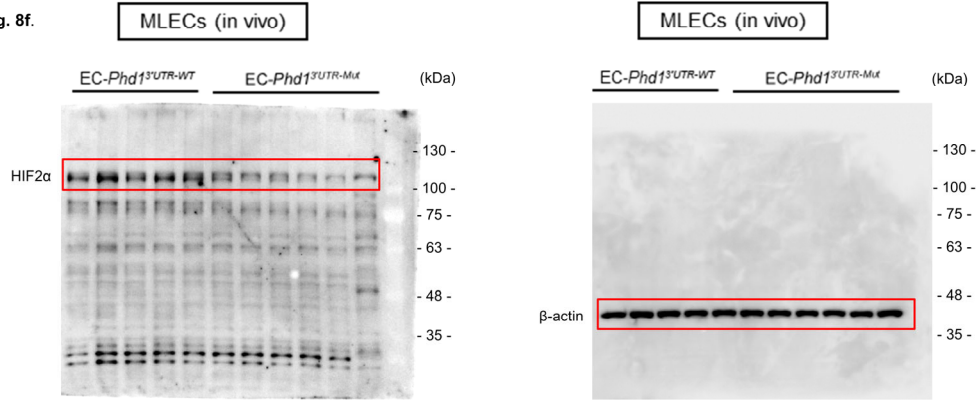

156  
157  
158  
159  
160  
161  
162  
163

**Uncropped WB images for Fig. 8f.** *EC-Phd1<sup>3'UTR-WT</sup>* and *EC-Phd1<sup>3'UTR-Mut</sup>* mice were treated with DOPC-formulated miR-23a-3p mimic on consecutive days 1, 2 and 3 after intratracheal LPS challenge, and HIF2α protein levels were measured by WB in isolated MLECs (n = 5 biological replicates for *EC-Phd1<sup>3'UTR-WT</sup>* mice and n = 6 biological replicates for *EC-Phd1<sup>3'UTR-Mut</sup>* mice). Samples were run on the same gels, with β-actin as a loading control.

Fig. 9f.

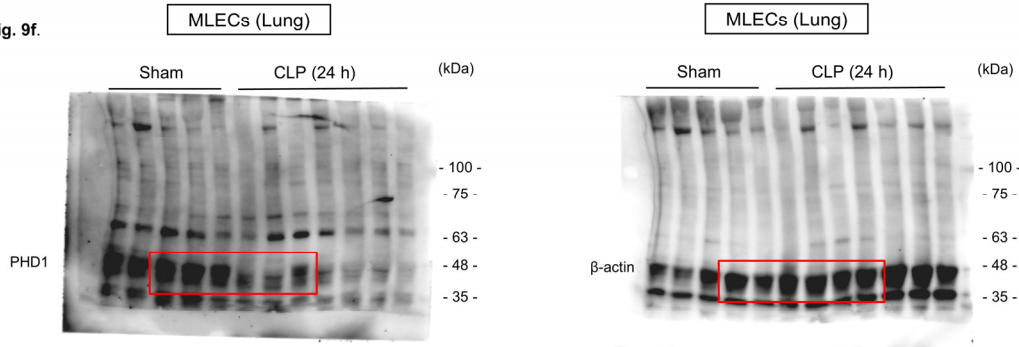

164  
165  
166  
167

**Uncropped WB images for Fig. 9f.** PHD1 expression in MLECs after sham surgery or CLP (n = 5 biological replicates for sham-operated mice and n = 7 CLP mice). Samples were run on the same gels, with β-actin as a loading control.

Fig. 9h.

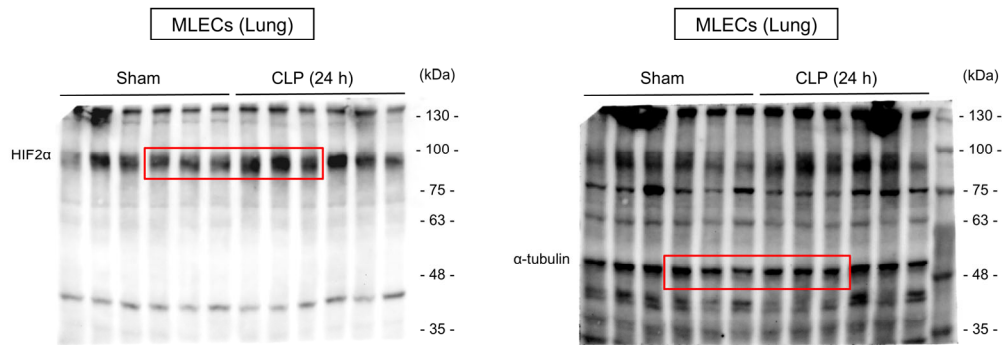

168

169 **Uncropped WB images for Fig. 9h.** HIF2α expression in MLECs after sham surgery or CLP  
170 (n = 6 biological replicates). Samples were run on the same gels, with α-tubulin as a loading  
171 control.

172

173

Fig. 9m.

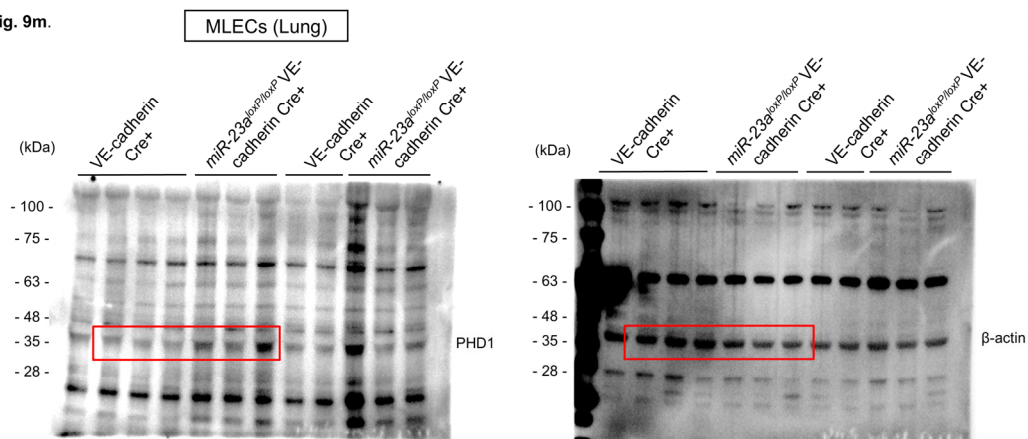

174

175 **Uncropped WB images for Fig. 9m.** VE-cadherin Cre+ and *miR-23a*<sup>loxP/loxP</sup> VE-cadherin Cre+  
176 mice were subjected to CLP, and PHD1 protein levels were measured by WB in isolated  
177 MLECs (n = 6 biological replicates). Samples were run on the same gels, with β-actin as a  
178 loading control.

179 **Supplementary Note 4: Uncropped gel blot images for Extended Data Figures.**

Extended Data Fig. 2f.

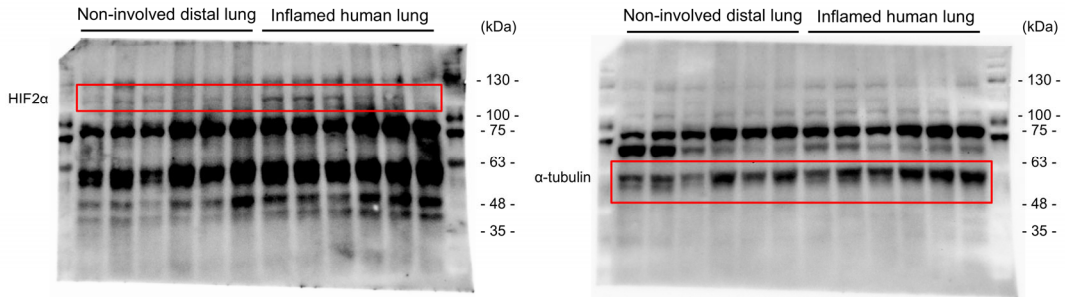

180

181 **Uncropped WB images for Extended Data Fig. 2f.** HIF2 $\alpha$  protein levels in human non-  
182 involved distal lung tissue and inflamed lung tissue (n = 6 biological replicates). Samples were  
183 run on the same gels, with  $\alpha$ -tubulin used as the loading control.

184

185

Extended Data Fig. 5c.

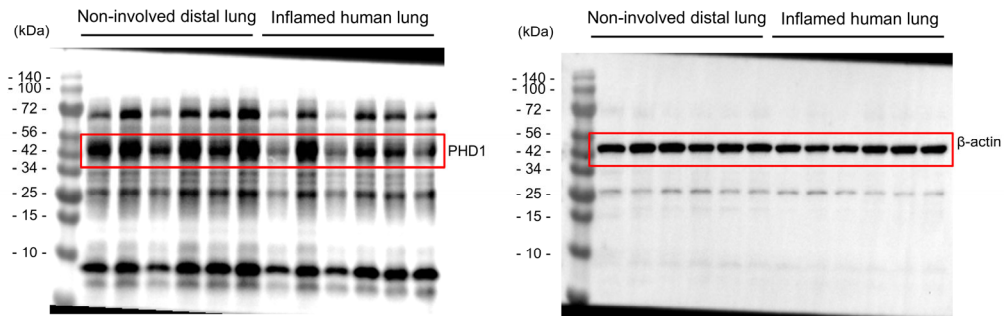

186

187 **Uncropped WB images for Extended Data Fig. 5c.** PHD1 expression in human non-involved  
188 distal lung tissue and inflamed lung tissue (n = 6 biological replicates). Samples were run on  
189 the same gels, with  $\beta$ -actin as a loading control.

Extended Data Fig. 6c.

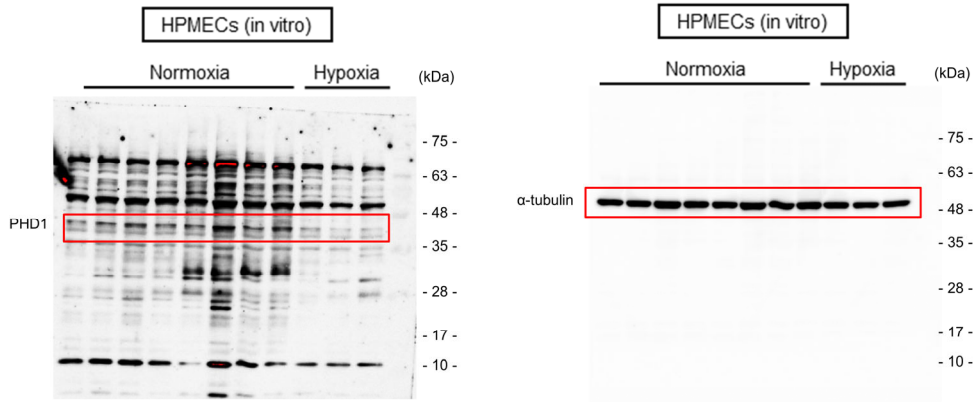

190  
191  
192  
193  
194  
195  
196  
197

**Uncropped WB images for Extended Data Fig. 6c.** PHD1 expression in HPMECs exposed to normoxia or hypoxia (n = 8 biological replicates for normoxia-treated cells and n = 3 biological replicates for hypoxia-treated cells). Samples were run on the same gels, with  $\alpha$ -tubulin as a loading control.

Extended Data Fig. 8b.

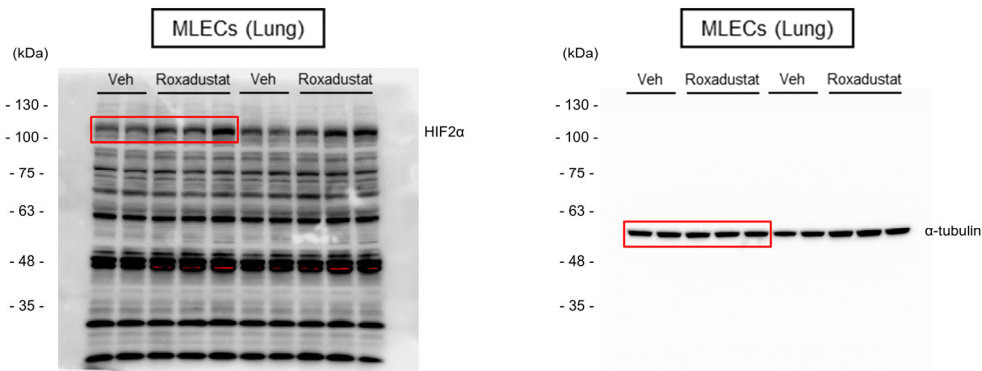

198  
199  
200  
201  
202

**Uncropped WB images for Extended Data Fig. 8b.** C57BL/6J mice were treated with vehicle or roxadustat after CLP, and HIF2 $\alpha$  protein levels were measured by WB in isolated MLECs (n = 4 biological replicates for vehicle mice and n = 6 biological replicates for roxadustat treated mice). Samples were run on the same gels, with  $\alpha$ -tubulin as a loading control.

203 **Supplementary Note 5: Uncropped gel blot images for Supplementary Figures**

Supplementary Fig. 2b.

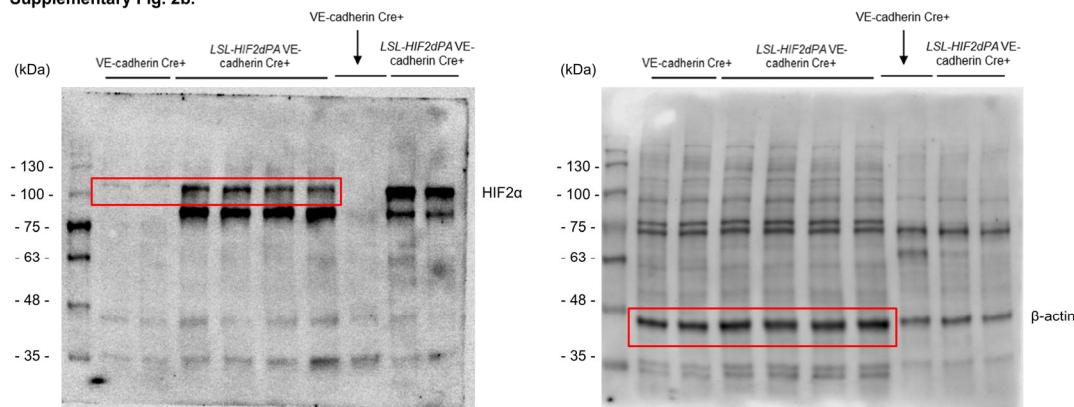

204

205 **Uncropped WB images for Supplementary Fig. 2b.** HIF2α protein levels in isolated MLECs  
 206 isolated from VE-cadherin Cre+ and *LSL-HIF2dPA* VE-cadherin Cre+ mice (n = 3 biological  
 207 replicates for VE-cadherin Cre+ mice and n = 6 biological replicates for *LSL-HIF2dPA* VE-  
 208 cadherin Cre+ mice). Samples were run on the same gels, with β-actin used as the loading  
 209 control.

210

211

Supplementary Fig. 6a.

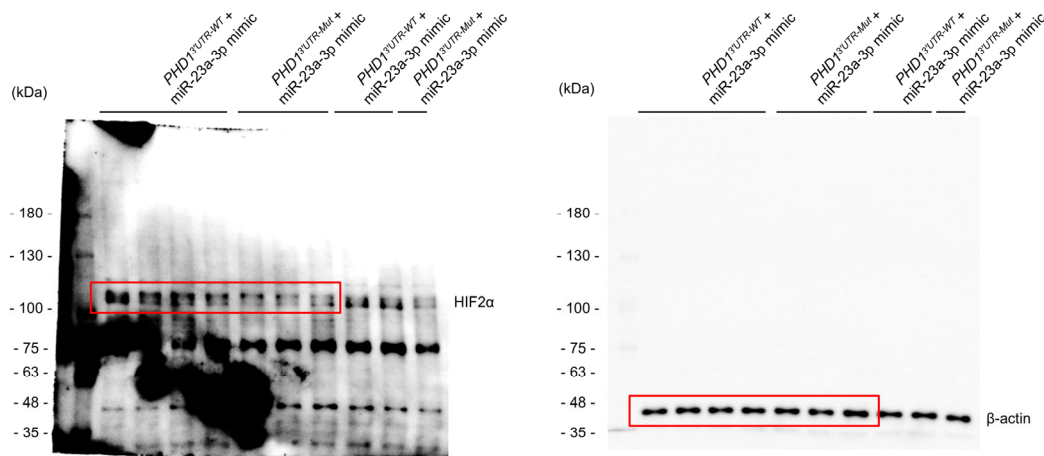

212

213 **Uncropped WB images for Supplementary Fig. 6a.** HIF2α protein levels in HPMECs  
 214 expressing *PHD1*<sup>3'UTR-WT</sup> or *PHD1*<sup>3'UTR-Mut</sup> after miR-23a-3p mimic treatment (n = 6 biological  
 215 replicates for *PHD1*<sup>3'UTR-WT</sup> cells and n = 4 biological replicates for *PHD1*<sup>3'UTR-Mut</sup> cells).  
 216 Samples were run on the same gels, with β-actin used as the loading control.
