# Supplementary material
Source: Research Square preprint supplement (doi:10.21203/rs.3.rs-9960398/v1)
Supplement: Supplementary file 1 [file 3348a9309cc6eaff719ea22e.xlsx]

## Sheet: MIR_GO_relations
Genes	Symbol	Confidence
HES1	miR-23a	Experimentally Observed
LMNB1	miR-23a	Experimentally Observed
NOTCH1	miR-23a	Experimentally Observed
CXCL12	miR-23a	Experimentally Observed
FBXO32	miR-23a	Experimentally Observed
IL6R	miR-23a	Experimentally Observed
MET	miR-23a	Experimentally Observed
PLAU	miR-23a	Experimentally Observed
PTEN	miR-23a	Experimentally Observed
ABL2	miR-23a	High (predicted)
ACVR1C	miR-23a	High (predicted)
ACVR2B	miR-23a	High (predicted)
ADGRL2	miR-23a	High (predicted)
ADRBK1	miR-23a	High (predicted)
AKAP12	miR-23a	High (predicted)
AMER1	miR-23a	High (predicted)
APAF1	miR-23a	High (predicted)
ARHGEF6	miR-23a	High (predicted)
ARHGEF7	miR-23a	High (predicted)
ARID3B	miR-23a	High (predicted)
ARSB	miR-23a	High (predicted)
ATG12	miR-23a	High (predicted)
ATMIN	miR-23a	High (predicted)
BACH2	miR-23a	High (predicted)
BCL2	miR-23a	High (predicted)
BCLAF1	miR-23a	High (predicted)
BLOC1S2	miR-23a	High (predicted)
BMPR1B	miR-23a	High (predicted)
BNIP2	miR-23a	High (predicted)
BNIP3L	miR-23a	High (predicted)
CALCR	miR-23a	High (predicted)
CARD8	miR-23a	High (predicted)
CASP7	miR-23a	High (predicted)
CBX5	miR-23a	High (predicted)
CCDC6	miR-23a	High (predicted)
CCND1	miR-23a	High (predicted)
CCNG1	miR-23a	High (predicted)
CCNL2	miR-23a	High (predicted)
CDC6	miR-23a	High (predicted)
CDK5R1	miR-23a	High (predicted)
CEBPA	miR-23a	High (predicted)
CHUK	miR-23a	High (predicted)
CLK3	miR-23a	High (predicted)
CNN2	miR-23a	High (predicted)
CNR1	miR-23a	High (predicted)
CREBBP	miR-23a	High (predicted)
CS	miR-23a	High (predicted)
CSNK2A1	miR-23a	High (predicted)
CSNK2A2	miR-23a	High (predicted)
CTCF	miR-23a	High (predicted)
CUL3	miR-23a	High (predicted)
CUX1	miR-23a	High (predicted)
DAB2IP	miR-23a	High (predicted)
DAPK1	miR-23a	High (predicted)
DEPDC1	miR-23a	High (predicted)
DGKE	miR-23a	High (predicted)
E2F6	miR-23a	High (predicted)
EBF1	miR-23a	High (predicted)
EGLN2	miR-23a	High (predicted)
EGR3	miR-23a	High (predicted)
ELF5	miR-23a	High (predicted)
ENC1	miR-23a	High (predicted)
ENTPD5	miR-23a	High (predicted)
EPAS1	miR-23a	High (predicted)
EPHB2	miR-23a	High (predicted)
ERBB4	miR-23a	High (predicted)
FAS	miR-23a	High (predicted)
FBXO11	miR-23a	High (predicted)
FGF2	miR-23a	High (predicted)
FGFR3	miR-23a	High (predicted)
FKBP5	miR-23a	High (predicted)
FLNB	miR-23a	High (predicted)
FOSB	miR-23a	High (predicted)
FOXL2	miR-23a	High (predicted)
FOXO4	miR-23a	High (predicted)
FRAT1	miR-23a	High (predicted)
GLS	miR-23a	High (predicted)
GREM1	miR-23a	High (predicted)
GSK3B	miR-23a	High (predicted)
HIC1	miR-23a	High (predicted)
HIPK2	miR-23a	High (predicted)
HMGA2	miR-23a	High (predicted)
HSP90B1	miR-23a	High (predicted)
ICMT	miR-23a	High (predicted)
IGF2BP1	miR-23a	High (predicted)
IL17RD	miR-23a	High (predicted)
IL6ST	miR-23a	High (predicted)
IPPK	miR-23a	High (predicted)
IRF1	miR-23a	High (predicted)
JAK1	miR-23a	High (predicted)
KITLG	miR-23a	High (predicted)
KMT5A	miR-23a	High (predicted)
LGALS8	miR-23a	High (predicted)
LPAR1	miR-23a	High (predicted)
LYPLA1	miR-23a	High (predicted)
MADD	miR-23a	High (predicted)
MAP3K1	miR-23a	High (predicted)
MAP3K5	miR-23a	High (predicted)
MAP4K4	miR-23a	High (predicted)
MAT2A	miR-23a	High (predicted)
MDM4	miR-23a	High (predicted)
MEF2A	miR-23a	High (predicted)
MGAT3	miR-23a	High (predicted)
MITF	miR-23a	High (predicted)
MTM1	miR-23a	High (predicted)
MTMR9	miR-23a	High (predicted)
MYO6	miR-23a	High (predicted)
NAA15	miR-23a	High (predicted)
NACC1	miR-23a	High (predicted)
NACC2	miR-23a	High (predicted)
NCOA1	miR-23a	High (predicted)
NEDD4	miR-23a	High (predicted)
NEK6	miR-23a	High (predicted)
NEK7	miR-23a	High (predicted)
NFIB	miR-23a	High (predicted)
NRGN	miR-23a	High (predicted)
NUAK1	miR-23a	High (predicted)
NUAK2	miR-23a	High (predicted)
OTUB1	miR-23a	High (predicted)
PAK2	miR-23a	High (predicted)
PAK6	miR-23a	High (predicted)
PDCD4	miR-23a	High (predicted)
PDE4B	miR-23a	High (predicted)
PDPK1	miR-23a	High (predicted)
PGR	miR-23a	High (predicted)
PLAGL1	miR-23a	High (predicted)
PMAIP1	miR-23a	High (predicted)
PPIF	miR-23a	High (predicted)
PPM1A	miR-23a	High (predicted)
PPM1D	miR-23a	High (predicted)
PRDM1	miR-23a	High (predicted)
PRDX3	miR-23a	High (predicted)
PRKCE	miR-23a	High (predicted)
PRKD3	miR-23a	High (predicted)
PRKRIR	miR-23a	High (predicted)
PROK2	miR-23a	High (predicted)
PTK2B	miR-23a	High (predicted)
PTPN11	miR-23a	High (predicted)
RAD23B	miR-23a	High (predicted)
RAP1A	miR-23a	High (predicted)
RAP1B	miR-23a	High (predicted)
AGGF1	miR-23a	Moderate (predicted)
ARG1	miR-23a	Moderate (predicted)
ASAH2	miR-23a	Moderate (predicted)
ASNS	miR-23a	Moderate (predicted)
AZI2	miR-23a	Moderate (predicted)
CALB1	miR-23a	Moderate (predicted)
CDH1	miR-23a	Moderate (predicted)
CSE1L	miR-23a	Moderate (predicted)
DDX47	miR-23a	Moderate (predicted)
DLC1	miR-23a	Moderate (predicted)
F2R	miR-23a	Moderate (predicted)
GNAS	miR-23a	Moderate (predicted)
HRG	miR-23a	Moderate (predicted)
KLF5	miR-23a	Moderate (predicted)
LTV1	miR-23a	Moderate (predicted)
MT2A	miR-23a	Moderate (predicted)
NAA16	miR-23a	Moderate (predicted)
NEDD9	miR-23a	Moderate (predicted)
PKP2	miR-23a	Moderate (predicted)
PRAME	miR-23a	Moderate (predicted)
PTPRQ	miR-23a	Moderate (predicted)
